# Supplementary material for: The legume-rhizobia symbiosis can be supported on Mars soil simulants
Source: PLoS One. 2021 Dec 8;16(12):e0259957. doi: 10.1371/journal.pone.0259957 (PMC8654199; doi:10.1371/journal.pone.0259957)
Supplement: S1 Raw data — (XLSX) [file pone.0259957.s001.xlsx]

## Sheet: data
S. meliloti
Mass								Lateral roots								Nodules
	Sand	MMS-1 Coarse	MMS-1 Fine	MMS-1 Unsorted	MMS-1 Superfine	MMS-2 Superfine			Sand	MMS-1 Coarse	MMS-1 Fine	MMS-1 Unsorted	MMS-1 Superfine	MMS-2 Superfine			Sand	MMS-1 Coarse	MMS-1 Fine	MMS-1 Unsorted	MMS-1 Superfine	MMS-2 Superfine
	0.244	0.177	0.117	0.096	0.157	0.106			30	16	6	16	9	5			22	9	8	13	15	14
	0.25	0.136	0.08	0.096	0.09	0.166			27	8	10	7	10	17			19	6	6	14	10	22
	0.234	0.094	0.09	0.067	0.135	0.16			29	11	6	6	10	11			14	11	5	5	13	13
	0.225	0.127	0.095	0.06	0.129	0.187			27	9	7	13	13	16			20	5	7	7	9	17
	0.301	0.12	0.09	0.108	0.129	0.084			22	9	11	6	11	3			13	5	10	17	13	9
	0.14	0.094	0.081	0.103	0.125	0.07			22	9	11	7	14	6			10	6	14	4	10	9
	0.237	0.113	0.077	0.06	0.06	0.163			24	10	12	5	5	16			12	6	4	6	8	13
	0.133	0.105	0.117	0.099	0.111	0.13			14	8	9	6	9	18			9	21	11	11	16	12
	0.13	0.141	0.115	0.08	0.109	0.075			11	12	9	8	12	4			12	13	6	11	12	5
	0.113	0.093	0.123	0.108	0.145	0.09			14	10	13	5	15	10			8	7	7	9	23	13
	0.13	0.136	0.123	0.07	0.129	0.11			9	9	8	9	8	6			9	4	13	11	15	13
	0.1	0.11	0.082	0.075	0.105	0.103			13	8	11	7	15	5			6	4	5	8	16	12
	0.12	0.109	0.1	0.1	0.084	0.09			23	10	16	5	6	5			13	8	6	10	5	5
	0.223	0.126	0.069	0.094	0.09	0.137			25	13	13	6	6	15			13	20	9	4	10	11
	0.147	0.076	0.05	0.061	0.1	0.122			19	12	19	5	9	15			8	16	6	6	9	8
	0.191	0.116	0.086	0.085	0.13	0.144			30	13	6	6	14	21			16	13	13	3	17	8
	0.174	0.075	0.073	0.0875	0.05	0.177			17	8	7	10	8	16			8	14	10	3	8	7
	0.205	0.085	0.08	0.073	0.119	0.118			27	10	10	6	9	13			19	15	6	6	12	10
	0.187	0.087	0.058	0.055	0.1	0.123			16	15	18	8	8	8			10	17	8	3	7	3
	0.164	0.073	0.053	0.06	0.105	0.16			23	20	20	8	6	14			16	8	11	2	12	13
	0.065	0.094	0.064	0.082	0.096	0.136			18	9	9	7	10	9			12	16	16	11	8	7
	0.077	0.07	0.057	0.061	0.09	0.21			10	14	13	6	5	9			10	13	23	8	5	6
	0.11	0.082	0.141	0.082	0.105	0.11			12	10	7	6	15	15			9	14	7	8	4	4
	0.065	0.077	0.14	0.111	0.112	0.178			17	15	10	8	9	16			11	14	13	3	7	7
	0.044	0.072	0.161	0.093	0.106	0.188			11	13	12	10	5	15			7	20	13	6	5	3
	0.122	0.06	0.08		0.11	0.105			19	10	14	12	7	6			11	14	11	6	12	0
	0.127	0.081	0.109		0.1	0.13			26	25	17	6	11	20			19	16	9	5	4	11
	0.137		0.145		0.07	0.15			15	13	9	13	4	7			10	13	16	9	6	3
	0.075		0.166		0.1	0.097			10	16	10	8	7	6			13	17	15	4	7	2
	0.078		0.13		0.074	0.173			6	26	8	8	8	12			9	7	8	7	6	7
	0.091		0.15		0.09	0.155			12	19	7	16	5	18			8	9	12	4	9	12
	0.06		0.145		0.091	0.116			13	22	11	6	6	15			9	6	15	7	7	10
	0.177		0.143		0.065	0.138			7	9	12	12	10	19			5	5	7	5	6	16
	0.154		0.198			0.226			7	21	12	6	6	12			3	11	11	13	6	12
	0.124		0.152			0.203			6	13	13	9	11	27			5	5	9	7	8	16
	0.169		0.11			0.201			6	8	15	8	11	12			4	5	10	9	9	15
	0.14		0.123			0.157			17	10	15	7	12	10			9	5	7	5	5	12
	0.167		0.082			0.151			10	16	9	7	7	13			4	6	4	9	6	11
	0.192		0.095			0.121			6	8	13	13	6	23			3	6	17	14	8	13
	0.18		0.15			0.166			6	11	10		7	17			5	21	8		13	8
	0.101		0.66			0.223			7	9	10		11	9			3	13	9		9	11
	0.167		0.136			0.162			5	9	15		6	15			5	7	13		12	15
	0.2		0.095			0.113			12	9	8		7	9			9	5	12		8	7
	0.164		0.104			0.133			7	10	7		9	10			7	10	10		7	7
			0.15			0.223			6	8	11		6	10			9	12	12		4	10
			0.167			0.135			9	12	9		6	17			13	9	9		4	13
			0.08						6	10	9		8	19			10	7	5		6	11
			0.17						13	9	13			24			6	14	12			17
			0.145						27	8	10			20			18	9	7			12
			0.111						19	10	6			23			8	16	13			15
			0.133						20	13	16			12			14	15	12			9
			0.07						13	12	12			8			5	10	5			11
			0.125						19		15			14			8		6			9
			0.108						17		18			28			12		10			18
			0.069						29		10			13			10		12			12
									23					17			19					14
									12					15			5					10
									19					12			21					8
									28					10			14					6
														14								8
														14								11
														10								5
S. medicae
Mass								Lateral roots								Nodules
	Sand	MMS-1 Coarse	MMS-1 Fine	MMS-1 Unsorted	MMS-1 Superfine	MMS-2 Superfine			Sand	MMS-1 Coarse	MMS-1 Fine	MMS-1 Unsorted	MMS-1 Superfine	MMS-2 Superfine			Sand	MMS-1 Coarse	MMS-1 Fine	MMS-1 Unsorted	MMS-1 Superfine	MMS-2 Superfine
	0.19	0.14	0.072	0.08	0.086	0.132			18	8	5	7	8	8			7	5	5	6	9	8
	0.133	0.085	0.083	0.082	0.069	0.232			16	14	6	8	7	12			4	10	6	5	11	16
	0.129	0.095	0.085	0.09	0.093	0.197			13	10	6	8	15	16			6	9	13	5	11	9
	0.206	0.115	0.089	0.07	0.099	0.064			17	7	8	7	13	10			8	7	4	6	8	10
	0.128	0.11	0.07	0.076	0.077	0.085			14	10	5	7	10	5			5	13	5	7	9	8
	0.091	0.095	0.069	0.091	0.115	0.121			12	10	8	8	8	13			13	6	9	7	9	11
	0.099	0.077	0.1	0.105	0.095	0.09			9	8	5	6	13	10			7	6	9	8	15	7
	0.13	0.08	0.107	0.102	0.085	0.115			23	6	8	6	12	12			17	6	7	5	10	6
	0.128	0.103	0.11	0.084	0.068	0.08			14	10	6	16	15	11			10	9	12	9	8	9
	0.084	0.08	0.066	0.114	0.084	0.108			19	8	6	10	9	12			9	6	6	15	9	8
	0.131	0.083	0.082	0.09	0.132	0.111			9	12	12	7	8	9			5	7	6	7	11	7
	0.119	0.08	0.095	0.082	0.112	0.077			11	10	20	8	8	10			13	6	11	9	11	10
	0.125	0.069	0.087	0.08	0.105	0.136			17	13	7	6	10	12			14	4	14	23	13	6
	0.074	0.097	0.099	0.15	0.14	0.162			13	6	15	20	10	10			6	10	10	16	17	11
	0.179	0.113	0.074	0.1	0.105	0.134			15	14	9	6	6	15			9	9	11	8	12	12
	0.254	0.095	0.085	0.088	0.122	0.224			18	7	8	5	8	13			13	16	10	10	9	8
	0.104	0.101	0.075	0.12	0.081	0.151			10	16	7	11	13	12			8	6	9	12	7	5
	0.194	0.09	0.07	0.09	0.105	0.206			12	12	10	5	20	10			14	6	7	6	8	6
	0.146	0.085	0.101	0.09	0.103	0.25			33	5	7	13	5	15			26	10	11	8	15	9
	0.17	0.076	0.11	0.1	0.121	0.17			11	8	9	9	13	16			7	5	10	11	7	10
	0.197	0.073	0.075	0.107	0.066	0.229			16	6	12	10	15	5			12	7	9	7	10	6
	0.207	0.087	0.136	0.097	0.09	0.117			26	10	6	9	16	9			4	8	8	9	9	8
	0.133	0.113	0.147	0.11	0.084	0.175			17	11	9	6	8	12			20	10	12	13	13	9
	0.16	0.106	0.103	0.093	0.064	0.203			12	14	12	12	10	8			11	8	10	8	8	7
	0.085	0.08	0.14	0.09	0.108	0.169			6	12	10	10	7	16			10	22	6	11	6	7
	0.109	0.169	0.135	0.1	0.1	0.208			11	19	6	7	7	6			3	15	6	8	8	8
	0.22	0.112	0.101	0.136	0.11	0.1			24	14	12	9	9	18			8	12	11	10	8	16
	0.173	0.106	0.095	0.1	0.086	0.199			13	16	5	13	6	14			18	9	5	11	7	10
	0.111	0.1	0.084	0.135	0.09	0.145			16	18	8	5	6	8			9	13	4	13	9	9
	0.123	0.11	0.082	0.116	0.181				14	15	7	16	10				13	15	5	8	8
	0.07	0.1	0.067	0.089	0.13				10	13	6	5	16				10	8	6	10	8
	0.223	0.17	0.115	0.113	0.17				15	14	7	13	15				6	16	10	12	12
	0.094	0.125	0.096	0.142	0.162				13	10	13	8	10				12	10	10	7	6
	0.077	0.111			0.14				18	12			18				7	9			13
	0.211	0.11			0.132				7	10			11				14	14			10
	0.104	0.09			0.12				8	20			16				9	15			11
	0.08	0.101			0.16				8	15			20				6	8			16
		0.095			0.188					9			6					10			6
		0.12			0.101					8			9					8			8
		0.1			0.096					12			10					16			8
		0.106			0.122					8			8					6			6
		0.118			0.1					10			9					7			6
		0.087			0.13					11			15					8			9
		0.106								8								6
		0.102								9								13
		0.125								11								10
